# Supplementary material for: Hard–Soft Core–Shell Architecture Formation from Cubic Cobalt Ferrite Nanoparticles
Source: MDPI journal article supplement (doi:10.3390/nano13101679), 2023-05-19
Supplement: s1 [file s1]

# Hard-soft core shell architecture formation from cubic cobalt ferrite nanoparticles

Marco Sanna Angotzi <sup>1,2</sup>, Valentina Mameli <sup>1,2,\*</sup>, Dominika Zákutná <sup>3</sup>, Fausto Secci <sup>1,2</sup>, Huolin L. Xin <sup>4</sup> and Carla Cannas <sup>1,2,\*</sup>

<sup>1</sup> Department of Chemical and Geological Sciences, University of Cagliari, Cittadella Universitaria S.P. Monserrato Sestu Km 0.700, 09042 Monserrato, Italy; marcosanna@unica.it; valentina.mameli@unica.it; fausto.secci@unica.it

<sup>2</sup> Consorzio Interuniversitario Nazionale per la Scienza e Tecnologia dei Materiali (INSTM), Cagliari Unit, Italy

<sup>3</sup> Department of Inorganic Chemistry, Charles University, Hlavova 2030, 128 40 Prague 2, Czech Republic; dominika.zakutna@natur.cuni.cz

<sup>4</sup> Department of Physics and Astronomy, University of California, Irvine, CA 92617; huolinx@uci.edu

\* Correspondence: ccannas@unica.it; valentina.mameli@unica.it

|                                                                                                                                                                                                                                                                                                                                                                     |   |
|---------------------------------------------------------------------------------------------------------------------------------------------------------------------------------------------------------------------------------------------------------------------------------------------------------------------------------------------------------------------|---|
| <b>Table S1.</b> Synthesis condition for the samples.....                                                                                                                                                                                                                                                                                                           | 2 |
| <b>Table S2.</b> Refined structural parameters obtained by Rietveld refinement of the XRD patterns of Co and Co@Mn samples by using one spinel ferrite phase (CoFe <sub>2</sub> O <sub>4</sub> ) for both samples. ....                                                                                                                                             | 4 |
| <b>Table S3.</b> Refined structural parameters obtained by Rietveld refinement of the XRD patterns of Co and Co@Mn samples by using two spinel ferrite phases (CoFe <sub>2</sub> O <sub>4</sub> , MnFe <sub>2</sub> O <sub>4</sub> ) for the Co@Mn sample. ....                                                                                                     | 5 |
| <b>Figure S1.</b> FTIR spectra (a), TGA curves (b) and corresponding derivatives (c) of the Co and Co@Mn samples.....                                                                                                                                                                                                                                               | 2 |
| <b>Figure S2.</b> TEM micrographs of the Co sample. ....                                                                                                                                                                                                                                                                                                            | 3 |
| <b>Figure S3.</b> TEM micrographs of the Co@Mn sample. ....                                                                                                                                                                                                                                                                                                         | 3 |
| <b>Figure S4.</b> Rietveld refinement by FullProf software of the XRD patterns of Co (pattern at the bottom) and Co@Mn (pattern in the upper part) samples by using (a) one spinel ferrite phase (CoFe <sub>2</sub> O <sub>4</sub> ) for both samples and (b) two spinel ferrite phases (CoFe <sub>2</sub> O <sub>4</sub> , MnFe <sub>2</sub> O <sub>4</sub> )..... | 4 |
| <b>Figure S5.</b> STEM-EDX chemical mapping for the sample Co.....                                                                                                                                                                                                                                                                                                  | 6 |
| <b>Figure S6.</b> HRTEM images (a, c, d) of the sample Co@Mn revealing structural defects; b) represents the masked inversed FFT image of a). ....                                                                                                                                                                                                                  | 6 |
| <b>Figure S7.</b> HRTEM micrographs (a, b, c) of the sample Co@Mn revealing structural defects.....                                                                                                                                                                                                                                                                 | 7 |

**Table S1.** Synthesis condition for the samples.

| Sample | n Oleate (mmol) <sup>a</sup> | Seeds (mg) | 1-pentanol (mL) | Ethanol (mL) | Toluene (mL) | Distilled water (mL) | Temperature (°C) | Reaction time |
|--------|------------------------------|------------|-----------------|--------------|--------------|----------------------|------------------|---------------|
| Co     | 2.75                         | -          | 10              | -            | 10           | 5                    | 220              | 10            |
| Co@Mn  | 1                            | 20 (Co)    | 10              | -            | 10           | 5                    | 220              | 10            |

<sup>a</sup>Referred to  $M^{II}$ - $Fe^{III}$  oleates.

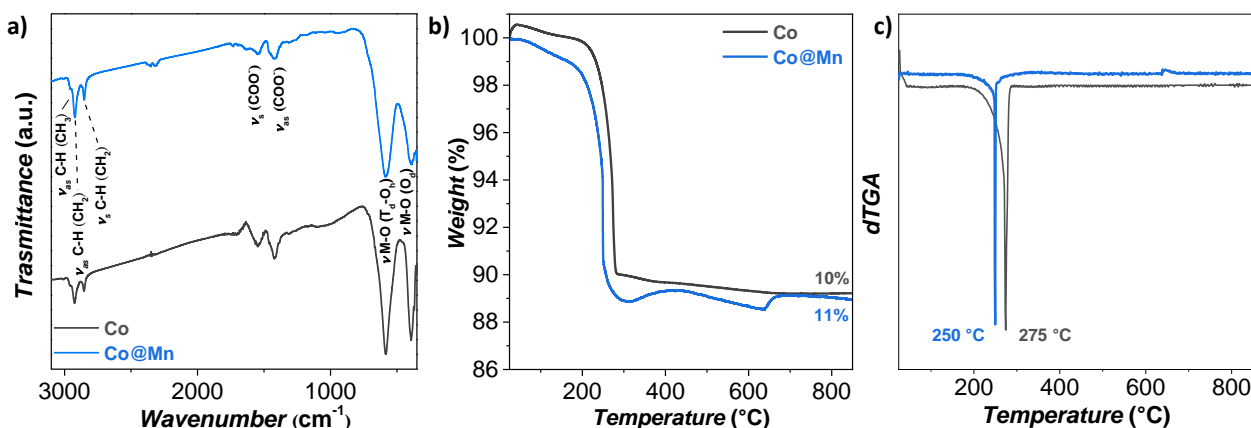

**Figure S1.** FTIR spectra (a), TGA curves (b) and corresponding derivatives (c) of the Co and Co@Mn samples.

FTIR spectra show the main vibrational modes related to the oleate molecule, *i.e.*, the  $COO^-$  vibrational modes ( $\nu_{as} COO^-$ ,  $\nu_s COO^-$  at 1550 and 1420  $cm^{-1}$ , respectively) and the ones related to the hydrocarbon chain ( $\nu C=C$ ,  $\nu_{as} C-H(CH_3)$ ,  $\nu_{as} C-H(CH_2)$ ,  $\nu_s C-H(CH_2)$ ,  $\nu_s C-H(CH_3)$ , at 3007, 2956, 2924, and 2853  $cm^{-1}$ , respectively). The bands at about 584  $cm^{-1}$  and 394  $cm^{-1}$  are due to the Me-O stretching mode of both the tetrahedral and octahedral sites, or the only octahedral sites of the spinel structure, respectively.<sup>1,2</sup>

TGA curves display a weight loss from about 200  $^{\circ}C$  till 300  $^{\circ}C$ , correspondent to the oleate decomposition.<sup>5,6</sup> The percentage, similar for the two samples, corresponds to a monolayer of capping molecule on the nanoparticles' surface.

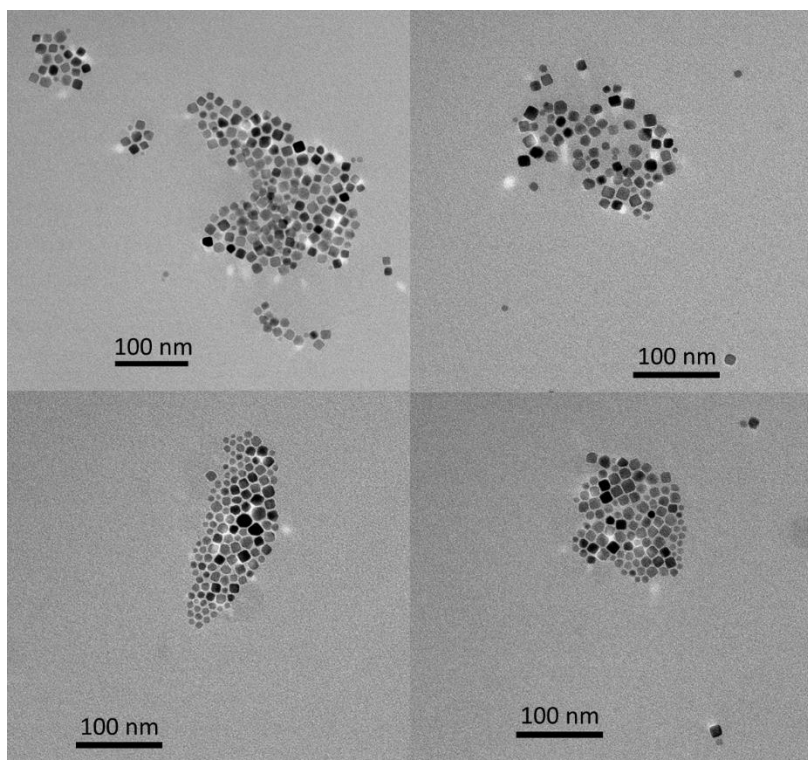

**Figure S2.** TEM micrographs of the Co sample.

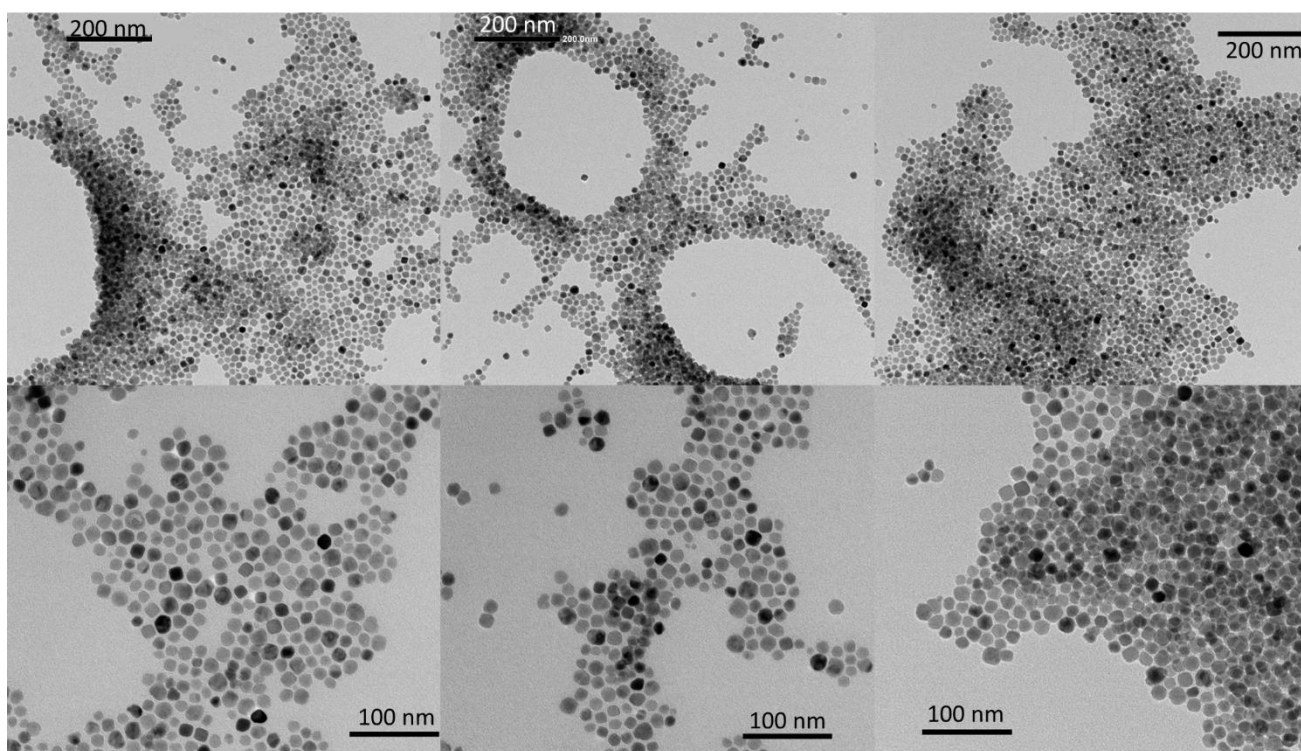

**Figure S3.** TEM micrographs of the Co@Mn sample.

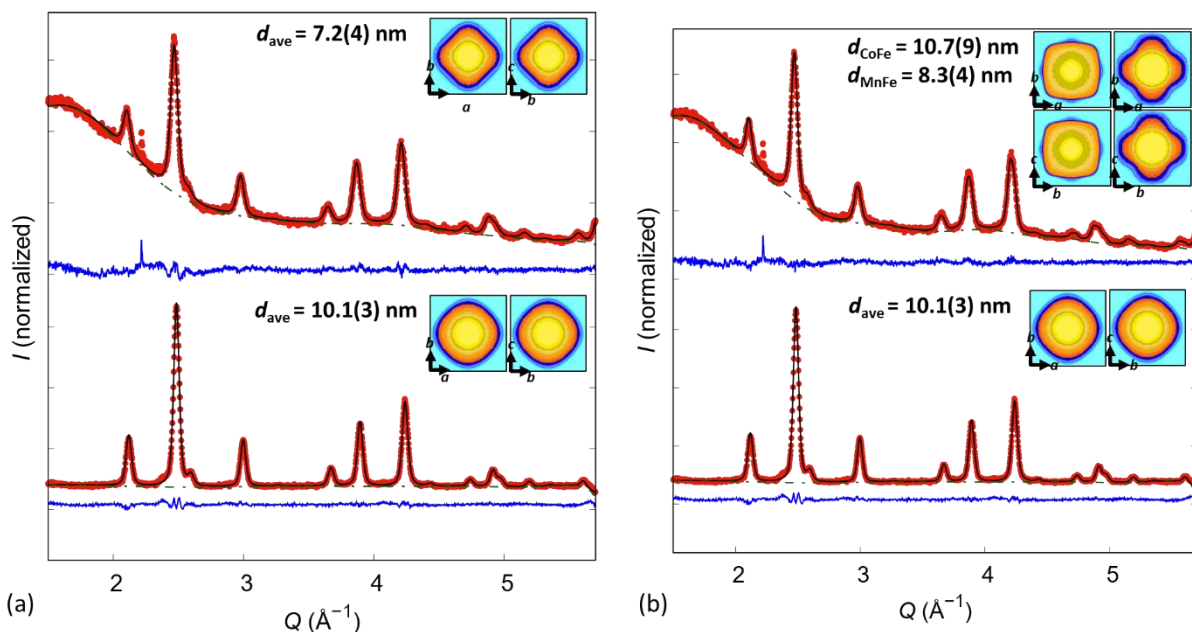

**Figure S4.** Rietveld refinement by FullProf software of the XRD patterns of Co (pattern at the bottom) and Co@Mn (pattern in the upper part) samples by using (a) one spinel ferrite phase ( $\text{CoFe}_2\text{O}_4$ ) for both samples and (b) two spinel ferrite phases ( $\text{CoFe}_2\text{O}_4$ ,  $\text{MnFe}_2\text{O}_4$ ).

**Table S2.** Refined structural parameters obtained by Rietveld refinement of the XRD patterns of Co and Co@Mn samples by using one spinel ferrite phase ( $\text{CoFe}_2\text{O}_4$ ) for both samples.

| parameter              | MA15105                            | MA15146                   |
|------------------------|------------------------------------|---------------------------|
|                        | $\text{CoFe}_2\text{O}_4$          | $\text{CoFe}_2\text{O}_4$ |
| a (Å)                  | 8.3914(2)                          | 8.4493(5)                 |
| u (x, y, z)            | 0.2558(1)                          | 0.2563(2)                 |
| profile function       | Thompson–Cox–Hastings pseudo-Voigt |                           |
| BOV ( $\text{\AA}^2$ ) | 1.30(2)                            | 0.07(3)                   |
| G ( $0.01^\circ$ )     | 0.217(2)                           | 0.361(6)                  |
| Zero ( $0.01^\circ$ )  | 0.065(1)                           | 0.195(3)                  |
| Spherical harmonics    | Laue class – m3m                   |                           |
| $K_{00}$               | 5.85(7)                            | 8.8(2)                    |
| $K_{41}$               | -0.71(8)                           | -1.9(1)                   |
| $K_{61}$               | -0.04(1)                           | 0.4(1)                    |
| $K_{62}$               | 0.00                               | 0.00                      |
| $K_{81}$               | -0.01(1)                           | 0.00                      |
| Background             | Chebyshev polynomial               |                           |
| n                      | 11                                 | 17                        |
| $R_B$ (%)              | 2.80                               | 3.18                      |
| $R_f$ (%)              | 2.57                               | 2.16                      |
| $R_p$ (%)              | 3.61                               | 2.76                      |

|                       |      |      |
|-----------------------|------|------|
| $R_{\text{exp}} (\%)$ | 3.22 | 1.98 |
| $\chi^2$              | 1.26 | 1.94 |

**Table S3.** Refined structural parameters obtained by Rietveld refinement of the XRD patterns of Co and Co@Mn samples by using two spinel ferrite phases ( $\text{CoFe}_2\text{O}_4$ ,  $\text{MnFe}_2\text{O}_4$ ) for the Co@Mn sample.

| parameter                                   | MA15105                            | MA15146                          |                                  |
|---------------------------------------------|------------------------------------|----------------------------------|----------------------------------|
|                                             | CoFe <sub>2</sub> O <sub>4</sub>   | CoFe <sub>2</sub> O <sub>4</sub> | MnFe <sub>2</sub> O <sub>4</sub> |
| a (Å)                                       | 8.3914(2)                          | 8.4030(9)                        | 8.4684(7)                        |
| <i>u</i> ( <i>x</i> , <i>y</i> , <i>z</i> ) | 0.2558(1)                          | 0.2561(6)                        | 0.2566(4)                        |
| profile function                            | Thompson–Cox–Hastings pseudo-Voigt |                                  |                                  |
| BOV (Å²)                                    | 1.30(2)                            | -                                | -                                |
| G (0.01°)                                   | 0.217(2)                           | 0.318(8)                         | 0.080(5)                         |
| Zero (0.01°)                                | 0.065(1)                           | 0.145(3)                         |                                  |
| Spherical harmonics                         | Laue class – m3m                   |                                  |                                  |
| K <sub>00</sub>                             | 5.85(7)                            | 3.4(4)                           | 11.0(2)                          |
| K <sub>41</sub>                             | -0.71(8)                           | -1.8(3)                          | 1.0(2)                           |
| K <sub>61</sub>                             | -0.04(1)                           | 0.4(2)                           | -0.3(1)                          |
| K <sub>62</sub>                             | 0.00                               | 0.00                             | 0.00                             |
| K <sub>81</sub>                             | -0.01(1)                           | 0.7(1)                           | -1.0(1)                          |
| Background                                  | Chebyshev polynomial               |                                  |                                  |
| n                                           | 11                                 | 22                               |                                  |
| R <sub>B</sub> (%)                          | 2.80                               | 2.99                             | 2.53                             |
| R <sub>f</sub> (%)                          | 2.57                               | 2.53                             | 2.14                             |
| R <sub>p</sub> (%)                          | 3.61                               | 2.25                             |                                  |
| R <sub>exp</sub> (%)                        | 3.22                               | 1.98                             |                                  |
| χ²                                          | 1.26                               | 1.29                             |                                  |

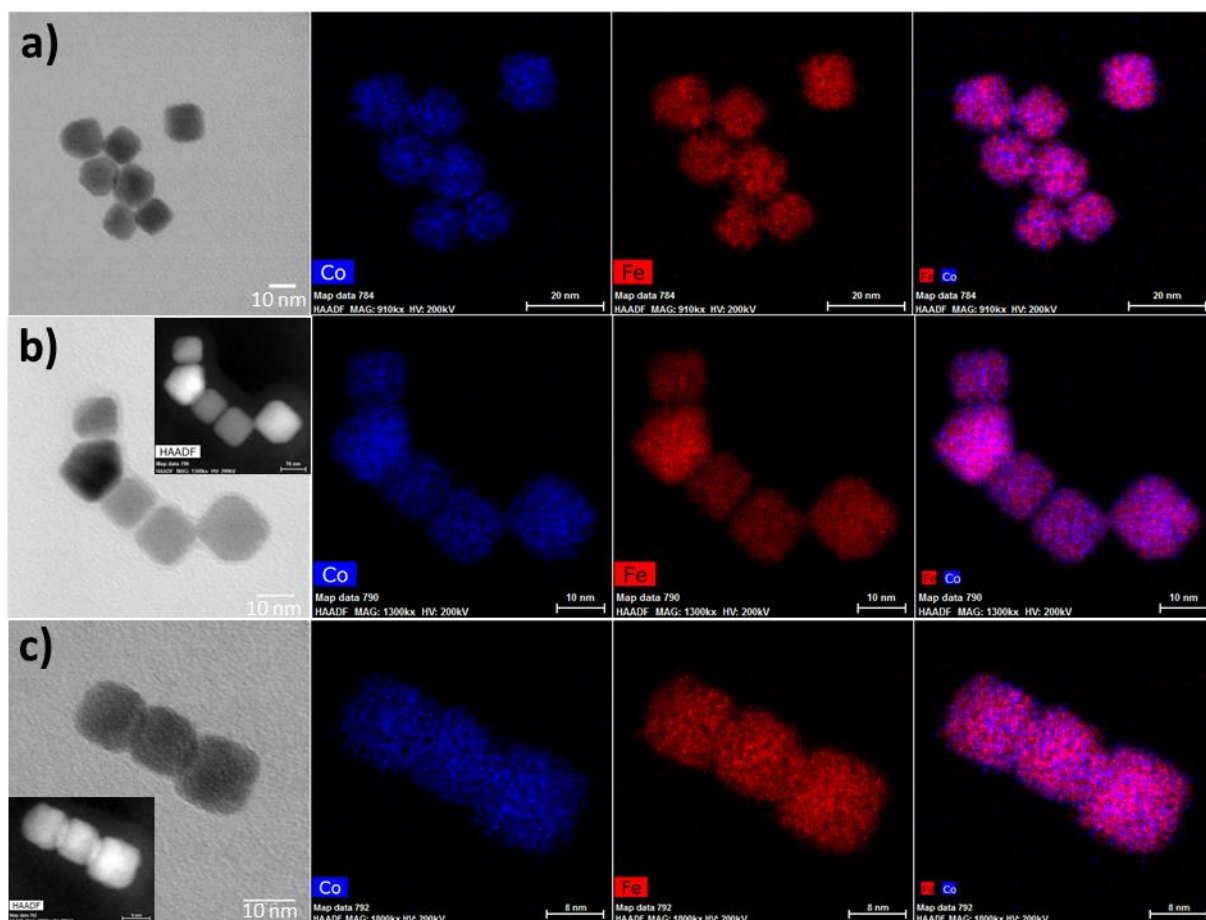

**Figure S5.** STEM-EDX chemical mapping (a,b,c) for the sample Co.

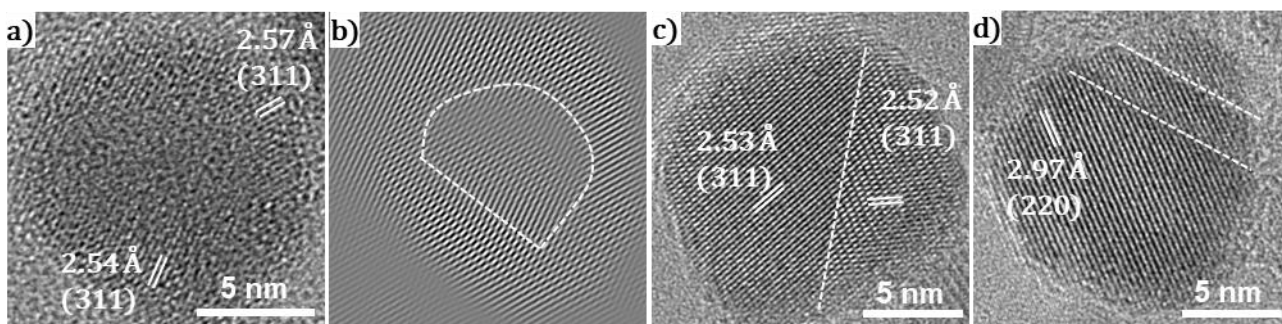

**Figure S6.** HRTEM images (a, c, d) of the sample Co@Mn revealing structural defects; b) represents the masked inverted FFT image of a).

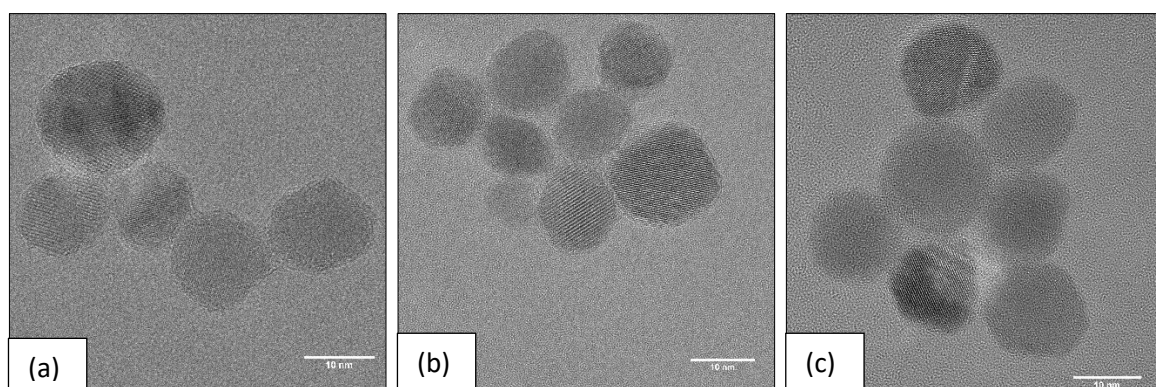

**Figure S7.** HRTEM micrographs (a, b, c) of the sample Co@Mn revealing structural defects.
